# Supplementary material
Source: Copernicus journal article supplement (doi:10.5194/bg-23-3807-2026)
Supplement: Supplementary file 1 [file bg-23-3807-2026-supplement.pdf]

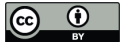

*Supplement of*

**Diatom–environment relationships and limnological variability: an updated quantitative tool for palaeoclimatology on sub-Antarctic Macquarie Island**

**Caitlin A. Selfe et al.**

*Correspondence to:* Caitlin A. Selfe (caitlin.selfe@hrd.qut.edu.au)

The copyright of individual parts of the supplement might differ from the article licence.

**Table S1:** Environmental parameters for lake sites included in the diatom dataset, including 2022 (LK) and 2006 (S) sampling. Mean values are shown for 2022 sampling. Site location refers to p = plateau or c = coastal sites, Si = silicate, PO<sub>4</sub><sup>-3</sup> = phosphate, TON = total oxidised nitrogen, < indicates measurements were below detection limits. Nutrient variables for 2022 (LK) sites were measured with ICP-AES and 2006 (S) sites were measured using an Alpkem Autoanalyser (Continuous Flow Solution Analyser).

| Lake ID | Easting | Northing | Site location | Temperature (°C) | DO (mg L <sup>-1</sup> ) | Conductivity (µS cm <sup>-1</sup> ) | pH   | Si (mg L <sup>-1</sup> ) | PO <sub>4</sub> <sup>-3</sup> (mg L <sup>-1</sup> ) | TON (mg L <sup>-1</sup> ) |
|---------|---------|----------|---------------|------------------|--------------------------|-------------------------------------|------|--------------------------|-----------------------------------------------------|---------------------------|
| LK1     | 494110  | 3959140  | p             | 8.4              | 11.49                    | 180                                 | 7.65 | 1.067                    | < 0.010                                             | < 0.060                   |
| LK2     | 492797  | 3957444  | p             | 8.6              | 11.88                    | 172                                 | 7.28 | 0.767                    | < 0.010                                             | <0.060                    |
| LK3     | 492869  | 3958492  | p             | 10.3             | 10.49                    | 253                                 | 6.60 | 1.400                    | < 0.010                                             | <0.060                    |
| LK4     | 494224  | 3956568  | p             | 6.8              | 12.31                    | 145                                 | 7.45 | 1.933                    | < 0.010                                             | <0.060                    |
| LK6     | 492282  | 3955664  | p             | 8.4              | 11.67                    | 232                                 | 7.26 | 0.300                    | < 0.010                                             | <0.060                    |
| LK7     | 494295  | 3955246  | p             | 7.5              | 11.87                    | 164                                 | 7.59 | 2.000                    | < 0.010                                             | <0.060                    |
| LK8     | 490596  | 3946005  | p             | 8.4              | 11.14                    | 143                                 | 6.94 | <0.100                   | < 0.010                                             | <0.060                    |
| LK9     | 493581  | 3953224  | p             | 8.7              | 12.61                    | 246                                 | 9.14 | 0.600                    | < 0.017                                             | <0.060                    |
| LK10    | 491985  | 3953033  | p             | 7.6              | 12.24                    | 248                                 | 7.07 | <0.100                   | < 0.010                                             | <0.060                    |
| LK11    | 493195  | 3952126  | p             | 9.3              | 11.19                    | 163                                 | 6.64 | <0.100                   | < 0.010                                             | <0.060                    |
| LK12    | 493150  | 3951470  | p             | 10.2             | 10.88                    | 156                                 | 6.22 | <0.100                   | < 0.010                                             | <0.060                    |
| LK15    | 493674  | 3950878  | p             | 9.2              | 10.80                    | 158                                 | 6.55 | 0.100                    | < 0.010                                             | <0.060                    |
| LK18    | 490230  | 3948626  | p             | 16.0             | 8.64                     | 206                                 | 6.79 | 0.450                    | 0.013                                               | <0.060                    |
| LK20    | 493012  | 3948146  | p             | 9.9              | 11.03                    | 148                                 | 7.32 | 0.600                    | < 0.010                                             | <0.060                    |
| LK21    | 491019  | 3948767  | p             | 8.1              | 11.93                    | 153                                 | 6.65 | <0.100                   | < 0.010                                             | <0.060                    |
| LK22    | 492706  | 3947350  | p             | 10.8             | 11.49                    | 168                                 | 7.21 | 1.233                    | < 0.010                                             | <0.060                    |
| LK23    | 491879  | 3947314  | p             | 8.3              | 12.05                    | 170                                 | 7.46 | 2.833                    | < 0.010                                             | <0.060                    |
| LK24    | 490162  | 3947027  | p             | 10.0             | 11.20                    | 200                                 | 7.50 | 1.433                    | < 0.010                                             | <0.060                    |
| LK28    | 490470  | 3944833  | p             | 7.5              | 11.88                    | 126                                 | 6.38 | 0.233                    | 0.013                                               | <0.060                    |
| LK29    | 490159  | 3945158  | p             | 7.3              | 11.26                    | 162                                 | 7.19 | 0.267                    | < 0.010                                             | <0.060                    |
| LK30    | 490821  | 3947661  | p             | 8.0              | 11.94                    | 144                                 | 6.37 | <0.100                   | < 0.010                                             | <0.060                    |
| LK31    | 489927  | 3942832  | p             | 9.0              | 11.30                    | 172                                 | 6.94 | <0.100                   | < 0.010                                             | <0.060                    |

| Lake ID | Easting | Northing | Site location | Temperature (°C) | DO (mg L <sup>-1</sup> ) | Conductivity (µS cm <sup>-1</sup> ) | pH   | Si (mg L <sup>-1</sup> ) | PO <sub>4</sub> <sup>-3</sup> (mg L <sup>-1</sup> ) | TON (mg L <sup>-1</sup> ) |
|---------|---------|----------|---------------|------------------|--------------------------|-------------------------------------|------|--------------------------|-----------------------------------------------------|---------------------------|
| LK35    | 489712  | 3940573  | p             | 8.3              | 11.97                    | 214                                 | 7.74 | 0.667                    | < 0.010                                             | <0.060                    |
| LK36    | 488705  | 3940234  | p             | 9.1              | 11.12                    | 230                                 | 7.14 | 0.233                    | < 0.010                                             | <0.060                    |
| LK37    | 488304  | 3940093  | p             | 9.5              | 10.89                    | 261                                 | 6.42 | 1.000                    | 0.007                                               | <0.060                    |
| LK38    | 488541  | 3938984  | p             | 9.5              | 11.22                    | 198                                 | 6.33 | 0.200                    | < 0.010                                             | <0.060                    |
| LK39    | 490086  | 3938527  | p             | 10.2             | 11.86                    | 177                                 | 8.01 | 0.133                    | 0.013                                               | <0.060                    |
| LK40    | 489342  | 3936465  | p             | 9.1              | 11.09                    | 164                                 | 6.88 | <0.100                   | < 0.010                                             | <0.060                    |
| LK42    | 488615  | 3932846  | p             | 7.3              | 12.01                    | 157                                 | 5.73 | <0.100                   | < 0.010                                             | 0.100                     |
| LK43    | 487915  | 3930746  | p             | 7.7              | 11.63                    | 169                                 | 6.73 | <0.100                   | < 0.010                                             | <0.060                    |
| S9      | 489342  | 3936465  | p             | 7.4              | 11.35                    | 224                                 | 7.46 | 0.066                    | 0.002                                               | 0.006                     |
| S11     | 488324  | 3933951  | p             | 6.9              | 11.52                    | 215                                 | 6.35 | 0.006                    | 0.001                                               | 0.008                     |
| S16     | 494029  | 3958628  | p             | 5.9              | 11.66                    | 179                                 | 6.98 | 0.070                    | 0.024                                               | 0.015                     |
| S18     | 492797  | 3957444  | p             | 5.5              | 11.80                    | 179                                 | 7.01 | 0.092                    | 0.004                                               | 0.005                     |
| S22     | 493222  | 3950937  | p             | 6.4              | 11.61                    | 164                                 | 6.79 | 0.003                    | 0.003                                               | 0.001                     |
| S37     | 490859  | 3953144  | c             | 8.6              | 9.17                     | 1136                                | 6.73 | 0.074                    | 1.029                                               | 0.181                     |
| S38     | 490756  | 3953694  | c             | 6.3              | 11.91                    | 1482                                | 7.47 | 0.170                    | 0.527                                               | 0.636                     |
| S45     | 490982  | 3957320  | c             | 6.0              | 10.75                    | 1244                                | 6.66 | 0.505                    | 9.890                                               | 0.160                     |
| S46     | 491353  | 3958630  | c             | 8.0              | 11.48                    | 693                                 | 7.32 | 2.459                    | 1.250                                               | 0.188                     |
| S47     | 491553  | 3958564  | c             | 8.7              | 12.03                    | 698                                 | 7.46 | 0.291                    | 1.558                                               | 2.540                     |
| S48     | 491557  | 3958671  | c             | 8.9              | 14.43                    | 603                                 | 8.12 | 2.706                    | 0.217                                               | 0.029                     |
| S49     | 491956  | 3959447  | c             | 13.1             | 13.59                    | 732                                 | 8.13 | 0.441                    | 0.415                                               | 0.085                     |
| S50     | 491979  | 3959468  | c             | 10.0             | 11.21                    | 1265                                | 7.85 | 1.064                    | 0.774                                               | 0.625                     |
| S51     | 492008  | 3959442  | c             | 8.2              | 9.55                     | 1094                                | 7.28 | 0.989                    | 0.672                                               | 1.947                     |
| S52     | 492158  | 3959475  | c             | 7.8              | 11.98                    | 710                                 | 7.41 | 0.696                    | 0.571                                               | 0.126                     |
| S54     | 487570  | 3939965  | c             | 6.8              | 11.51                    | 1179                                | 6.77 | 0.100                    | 0.808                                               | 1.052                     |
| S55     | 487545  | 3939906  | c             | 6.9              | 10.44                    | 1478                                | 5.50 | 0.079                    | 0.101                                               | 0.117                     |
| S56     | 488208  | 3940384  | c             | 7.6              | 10.97                    | 646                                 | 6.61 | 0.096                    | 2.249                                               | 1.936                     |

**Table S2:** Environmental parameters and stable water isotopes for 2022 lake water samples. Lake type refers to Meredith et al. (2022) lake clusters, 1 = Sea-spray dominated, 2 = catchment dominated, 3 = rainfall dominated, \*indicates lakes also included in the diatom dataset.

| Lake ID | Easting | Northing | Lake type | Distance from west coast (km) | Elevation (m) | Temperature (°C) | DO (mg L <sup>-1</sup> ) | Conductivity (µS cm <sup>-1</sup> ) | pH  | δ <sup>2</sup> H (‰) | δ <sup>18</sup> O (‰) | d-excess (‰) |
|---------|---------|----------|-----------|-------------------------------|---------------|------------------|--------------------------|-------------------------------------|-----|----------------------|-----------------------|--------------|
| LK1*    | 494110  | 3959140  | 3         | 2.48                          | 217           | 8.6              | 11.7                     | 191                                 | 7.5 | -26.83               | -3.87                 | 4.10         |
| LK2*    | 492797  | 3957444  | 3         | 1.31                          | 216           | 8.1              | 12.0                     | 179                                 | 7.2 | -24.47               | -3.60                 | 4.36         |
| LK3*    | 492869  | 3958492  | 1         | 2.14                          | 185           | 9.2              | 11.5                     | 214                                 | 6.7 | -29.90               | -4.63                 | 7.14         |
| LK4*    | 494224  | 3956568  | 3         | 3.27                          | 314           | 6.4              | 12.6                     | 151                                 | 7.3 | -27.87               | -4.24                 | 6.05         |
| LK6*    | 492282  | 3955664  | 1         | 1.01                          | 169           | 7.5              | 11.8                     | 240                                 | 7.2 | -15.27               | -1.99                 | 0.65         |
| LK7*    | 494295  | 3955246  | 3         | 2.86                          | 256           | 7.1              | 12.4                     | 172                                 | 7.5 | -29.87               | -4.62                 | 7.12         |
| LK8*    | 490596  | 3946005  | 3         | 2.03                          | 188           | 8.3              | 11.4                     | 153                                 | 6.4 | -23.17               | -3.01                 | 0.89         |
| LK9*    | 493581  | 3953224  | 2         | 2.79                          | 138           | 8.6              | 12.9                     | 260                                 | 9.1 | -28.27               | -4.11                 | 4.61         |
| LK10*   | 491985  | 3953033  | 1         | 1.49                          | 198           | 6.8              | 12.3                     | 231                                 | 7.1 | -15.57               | -1.81                 | -1.11        |
| LK11*   | 493195  | 3952126  | 3         | 2.87                          | 173           | 8.9              | 11.4                     | 171                                 | 6.6 | -23.57               | -2.99                 | 0.38         |
| LK12    | 493150  | 3951470  | 3         | 3.25                          | 163           | 10.3             | 10.9                     | 168                                 | 6.2 | -17.73               | -2.15                 | -0.53        |
| LK14    | 493222  | 3950937  | 3         | 3.51                          | 163           | 7.9              | 11.4                     | 159                                 | 7.0 | -23.07               | -3.50                 | 4.96         |
| LK15*   | 493674  | 3950878  | 3         | 4                             | 163           | 9.6              | 10.6                     | 170                                 | 6.5 | -16.57               | -2.18                 | 0.87         |
| LK16    | 493174  | 3948589  | 2         | 3.66                          | 95            | 9.4              | 10.5                     | 168                                 | 7.2 | -16.05               | -2.22                 | 1.71         |
| LK18*   | 490230  | 3948626  | 1         | 1                             | 214           | 16.1             | 8.7                      | 211                                 | 7.0 | -19.35               | -3.06                 | 5.09         |
| LK19    | 491403  | 3948287  | 3         | 2.21                          | 230           | 7.4              | 12.5                     | 165                                 | 7.1 | -27.23               | -4.03                 | 5.03         |
| LK20*   | 493012  | 3948146  | 3         | 3.82                          | 126           | 10.0             | 11.3                     | 156                                 | 7.3 | -23.80               | -4.05                 | 8.57         |
| LK21*   | 491019  | 3948767  | 3         | 1.9                           | 251           | 7.6              | 12.3                     | 161                                 | 6.6 | -25.87               | -4.37                 | 9.12         |
| LK22*   | 492706  | 3947350  | 3         | 4.14                          | 103           | 10.9             | 11.8                     | 186                                 | 7.3 | -22.33               | -2.97                 | 1.40         |
| LK23*   | 491879  | 3947314  | 2         | 3.32                          | 201           | 7.8              | 12.3                     | 176                                 | 7.3 | -35.93               | -5.19                 | 5.59         |
| LK24*   | 490162  | 3947027  | 2         | 1.51                          | 144           | 9.8              | 11.1                     | 209                                 | 7.4 | -28.10               | -4.15                 | 5.10         |
| LK25    | 489858  | 3946831  | 2         | 1.42                          | 141           | 10.2             | 11.9                     | 225                                 | 8.2 | -26.23               | -3.72                 | 3.53         |
| LK26    | 493186  | 3946456  | 2         | 4.69                          | 9             | 10.4             | 12.0                     | 210                                 | 7.6 | -36.47               | -5.46                 | 7.19         |
| LK27    | 490046  | 3944396  | 3         | 2.01                          | 189           | 6.8              | 11.5                     | 188                                 | 7.1 | -31.77               | -4.54                 | 4.58         |
| LK28*   | 490470  | 3944833  | 3         | 1.88                          | 223           | 7.6              | 11.9                     | 135                                 | 6.4 | -22.13               | -2.65                 | -0.93        |

| Lake ID | Easting | Northing | Lake type | Distance from   |  | Elevation (m) | Temperature (°C) | DO (mg L <sup>-1</sup> ) | Conductivity (µS cm <sup>-1</sup> ) | pH  | δ <sup>2</sup> H (‰) | δ <sup>18</sup> O (‰) | d-excess (‰) |
|---------|---------|----------|-----------|-----------------|--|---------------|------------------|--------------------------|-------------------------------------|-----|----------------------|-----------------------|--------------|
|         |         |          |           | west coast (km) |  |               |                  |                          |                                     |     |                      |                       |              |
| LK29*   | 490159  | 3945158  | 3         | 1.61            |  | 206           | 7.2              | 11.2                     | 171                                 | 7.1 | -27.20               | -4.15                 | 5.97         |
| LK30*   | 490821  | 3947661  | 2         | 2.02            |  | 176           | 8.1              | 12.0                     | 150                                 | 6.0 | -25.70               | -3.84                 | 5.05         |
| LK31*   | 489927  | 3942832  | 3         | 1.24            |  | 260           | 8.7              | 11.6                     | 178                                 | 6.7 | -26.73               | -4.14                 | 6.39         |
| LK32    | 491780  | 3943075  | 3         | 3.05            |  | 191           | 10.1             | 11.3                     | 146                                 | 6.6 | -24.70               | -3.79                 | 5.62         |
| LK34    | 491707  | 3942016  | 3         | 2.8             |  | 126           | 12.7             | 11.3                     | 183                                 | 8.7 | -22.43               | -2.72                 | -0.65        |
| LK35*   | 489712  | 3940573  | 1         | 1.77            |  | 223           | 7.9              | 12.1                     | 223                                 | 7.4 | -23.67               | -3.22                 | 2.12         |
| LK36*   | 488705  | 3940234  | 1         | 1.27            |  | 189           | 8.7              | 11.3                     | 240                                 | 7.0 | -25.60               | -3.71                 | 4.05         |
| LK37*   | 488304  | 3940093  | 1         | 1.08            |  | 196           | 9.1              | 11.0                     | 267                                 | 6.4 | -16.75               | -1.88                 | -1.75        |
| LK38*   | 488541  | 3938984  | 1         | 1.27            |  | 185           | 9.2              | 11.2                     | 204                                 | 6.3 | -25.77               | -3.58                 | 2.85         |
| LK39*   | 490086  | 3938527  | 2         | 2.58            |  | 184           | 10.4             | 11.6                     | 189                                 | 7.7 | -21.50               | -2.99                 | 2.45         |
| LK40*   | 489342  | 3936465  | 3         | 1.63            |  | 208           | 9.1              | 11.3                     | 173                                 | 7.0 | -26.73               | -3.90                 | 4.49         |
| LK41    | 488929  | 3934629  | 3         | 1.76            |  | 306           | 7.2              | 12.0                     | 160                                 | 6.8 | -29.00               | -4.42                 | 6.39         |
| LK42*   | 488615  | 3932846  | 3         | 1.57            |  | 278           | 7.4              | 12.1                     | 168                                 | 5.6 | -22.20               | -3.22                 | 3.56         |
| LK43*   | 487915  | 3930746  | 3         | 2.27            |  | 252           | 7.9              | 11.8                     | 180                                 | 6.7 | -25.93               | -3.72                 | 3.80         |
| LK44    | 493546  | 3960364  | 1         | 1               |  | 200           | 9.5              | 11.5                     | 233                                 | 6.4 | -25.33               | -3.35                 | 1.49         |

**Table S3:** Anions and Cations for 2022 lake water samples (mmol L<sup>-1</sup>)

| Lake ID | Cl    | SO <sub>4</sub> | Br     | Na    | Ca    | Mg    | K     | SiO <sub>2</sub> | Fe     | F-     | Al     |
|---------|-------|-----------------|--------|-------|-------|-------|-------|------------------|--------|--------|--------|
| LK1     | 1.347 | 0.074           | 0.0010 | 1.195 | 0.082 | 0.182 | 0.025 | 0.038            | 0.0006 | 0.0033 | 0.0033 |
| LK2     | 1.305 | 0.076           | 0.0015 | 1.115 | 0.073 | 0.174 | 0.025 | 0.027            | 0.0001 | 0.0006 | 0.0006 |
| LK3     | 1.492 | 0.099           | 0.0011 | 1.305 | 0.053 | 0.147 | 0.029 | 0.050            | 0.0005 | 0.0042 | 0.0042 |
| LK4     | 1.171 | 0.072           | 0.0013 | 0.996 | 0.088 | 0.152 | 0.022 | 0.069            | 0.0002 | 0.0009 | 0.0009 |
| LK6     | 2.045 | 0.107           | 0.0025 | 1.762 | 0.062 | 0.191 | 0.038 | 0.011            | 0.0010 | 0.0057 | 0.0057 |
| LK7     | 1.220 | 0.084           | 0.0015 | 1.076 | 0.114 | 0.181 | 0.020 | 0.071            | 0.0003 | 0.0010 | 0.0010 |
| LK8     | 1.241 | 0.062           | 0.0013 | 1.044 | 0.025 | 0.116 | 0.029 | 0.004            | 0.0003 | 0.0014 | 0.0014 |
| LK9     | 1.772 | 0.085           | 0.0014 | 1.531 | 0.290 | 0.257 | 0.009 | 0.021            | 0.0007 | 0.0011 | 0.0011 |
| LK10    | 2.003 | 0.115           | 0.0023 | 1.712 | 0.051 | 0.186 | 0.040 | 0.004            | 0.0003 | 0.0017 | 0.0017 |
| LK11    | 1.299 | 0.068           | 0.0018 | 1.083 | 0.033 | 0.121 | 0.028 | 0.004            | 0.0001 | 0.0004 | 0.0004 |
| LK12    | 1.264 | 0.073           | 0.0018 | 1.054 | 0.033 | 0.120 | 0.027 | 0.004            | 0.0001 | 0.0007 | 0.0007 |
| LK14    | 1.248 | 0.060           | 0.0016 | 1.045 | 0.034 | 0.119 | 0.023 | 0.004            | 0.0001 | 0.0003 | 0.0003 |
| LK15    | 1.249 | 0.064           | 0.0016 | 1.064 | 0.031 | 0.120 | 0.031 | 0.004            | 0.0005 | 0.0017 | 0.0017 |
| LK16    | 1.207 | 0.048           | 0.0012 | 1.059 | 0.075 | 0.158 | 0.023 | 0.030            | 0.0028 | 0.0037 | 0.0037 |
| LK18    | 1.413 | 0.085           | 0.0020 | 1.279 | 0.031 | 0.113 | 0.040 | 0.016            | 0.0026 | 0.0126 | 0.0126 |
| LK19    | 1.248 | 0.061           | 0.0013 | 1.074 | 0.067 | 0.143 | 0.025 | 0.005            | 0.0006 | 0.0019 | 0.0019 |
| LK20    | 1.151 | 0.057           | 0.0016 | 0.982 | 0.050 | 0.128 | 0.026 | 0.021            | 0.0010 | 0.0026 | 0.0026 |
| LK21    | 1.288 | 0.069           | 0.0017 | 1.102 | 0.030 | 0.120 | 0.028 | 0.004            | 0.0002 | 0.0007 | 0.0007 |
| LK22    | 1.202 | 0.055           | 0.0016 | 1.038 | 0.122 | 0.133 | 0.029 | 0.044            | 0.0035 | 0.0025 | 0.0025 |
| LK23    | 1.275 | 0.066           | 0.0014 | 1.096 | 0.165 | 0.148 | 0.025 | 0.101            | 0.0001 | 0.0005 | 0.0005 |
| LK24    | 1.532 | 0.074           | 0.0019 | 1.324 | 0.166 | 0.176 | 0.022 | 0.051            | 0.0016 | 0.0030 | 0.0030 |
| LK25    | 1.651 | 0.077           | 0.0019 | 1.419 | 0.187 | 0.174 | 0.021 | 0.019            | 0.0009 | 0.0031 | 0.0031 |
| LK26    | 1.332 | 0.085           | 0.0019 | 1.338 | 0.251 | 0.104 | 0.012 | 0.154            | 0.0042 | 0.0018 | 0.0018 |
| LK27    | 1.516 | 0.079           | 0.0018 | 1.283 | 0.097 | 0.156 | 0.027 | 0.032            | 0.0001 | 0.0004 | 0.0004 |
| LK28    | 1.102 | 0.064           | 0.0015 | 0.928 | 0.027 | 0.105 | 0.023 | 0.008            | 0.0018 | 0.0080 | 0.0080 |
| LK29    | 1.361 | 0.066           | 0.0017 | 1.170 | 0.093 | 0.145 | 0.027 | 0.009            | 0.0003 | 0.0011 | 0.0011 |
| LK30    | 1.196 | 0.068           | 0.0015 | 0.999 | 0.026 | 0.109 | 0.024 | 0.004            | 0.0001 | 0.0007 | 0.0007 |
| LK31    | 1.469 | 0.074           | 0.0020 | 1.245 | 0.037 | 0.136 | 0.029 | 0.004            | 0.0001 | 0.0004 | 0.0004 |

| Lake ID | Cl    | SO <sub>4</sub> | Br     | Na    | Ca    | Mg    | K     | SiO <sub>2</sub> | Fe     | F-     | Al     |
|---------|-------|-----------------|--------|-------|-------|-------|-------|------------------|--------|--------|--------|
| LK32    | 1.090 | 0.057           | 0.0013 | 0.912 | 0.033 | 0.105 | 0.022 | 0.004            | 0.0001 | 0.0004 | 0.0004 |
| LK34    | 1.248 | 0.054           | 0.0014 | 1.073 | 0.081 | 0.132 | 0.020 | 0.004            | 0.0008 | 0.0016 | 0.0016 |
| LK35    | 1.832 | 0.090           | 0.0022 | 1.540 | 0.133 | 0.192 | 0.031 | 0.024            | 0.0001 | 0.0016 | 0.0016 |
| LK36    | 1.965 | 0.101           | 0.0026 | 1.630 | 0.081 | 0.192 | 0.034 | 0.008            | 0.0001 | 0.0005 | 0.0005 |
| LK37    | 2.419 | 0.113           | 0.0044 | 2.012 | 0.050 | 0.218 | 0.048 | 0.036            | 0.0161 | 0.0317 | 0.0317 |
| LK38    | 1.703 | 0.093           | 0.0025 | 1.430 | 0.036 | 0.151 | 0.034 | 0.007            | 0.0001 | 0.0007 | 0.0007 |
| LK39    | 1.372 | 0.064           | 0.0015 | 1.169 | 0.079 | 0.176 | 0.015 | 0.005            | 0.0012 | 0.0020 | 0.0020 |
| LK40    | 1.385 | 0.069           | 0.0019 | 1.148 | 0.034 | 0.129 | 0.026 | 0.004            | 0.0001 | 0.0004 | 0.0004 |
| LK41    | 1.342 | 0.063           | 0.0021 | 1.118 | 0.053 | 0.130 | 0.025 | 0.009            | 0.0002 | 0.0007 | 0.0007 |
| LK42    | 1.418 | 0.075           | 0.0024 | 1.163 | 0.030 | 0.128 | 0.028 | 0.004            | 0.0004 | 0.0020 | 0.0020 |
| LK43    | 1.528 | 0.064           | 0.0025 | 1.266 | 0.039 | 0.133 | 0.033 | 0.004            | 0.0002 | 0.0008 | 0.0008 |
| LK44    | 1.866 | 0.090           | 0.0021 | 1.573 | 0.041 | 0.174 | 0.041 | 0.005            | 0.0023 | 0.0049 | 0.0049 |

**Table S4:** Mean major ions (mmol L<sup>-1</sup>) and stable water isotope (‰) results for the 40 lakes sampled in 2018 and 2022.

|             | Cl    | SO <sub>4</sub> | Br    | Na    | Ca    | Mg    | K     | SiO <sub>2</sub> | Fe    | F <sup>-</sup> | Al    | δ <sup>2</sup> H | δ <sup>18</sup> O |
|-------------|-------|-----------------|-------|-------|-------|-------|-------|------------------|-------|----------------|-------|------------------|-------------------|
| <b>2018</b> |       |                 |       |       |       |       |       |                  |       |                |       |                  |                   |
| Mean        | 1.965 | 0.103           | 0.003 | 1.350 | 0.085 | 0.325 | 0.032 | 0.013            | 0.001 | 0.001          | 0.002 | -20.1            | -2.8              |
| Min         | 1.379 | 0.065           | 0.001 | 0.987 | 0.025 | 0.219 | 0.005 | 0.001            | 0.000 | 0.001          | 0.000 | -34.9            | -5.3              |
| Max         | 3.667 | 0.211           | 0.007 | 2.566 | 0.287 | 0.590 | 0.064 | 0.087            | 0.003 | 0.006          | 0.006 | -1.9             | 0.7               |
| <b>2022</b> |       |                 |       |       |       |       |       |                  |       |                |       |                  |                   |
| Mean        | 1.593 | 0.083           | 0.002 | 1.272 | 0.080 | 0.197 | 0.029 | 0.020            | 0.001 | 0.002          | 0.002 | -23.4            | -3.3              |
| Min         | 1.191 | 0.055           | 0.001 | 0.931 | 0.025 | 0.133 | 0.009 | 0.003            | 0.000 | 0.000          | 0.000 | -35.6            | -5.3              |
| Max         | 2.779 | 0.155           | 0.005 | 2.073 | 0.289 | 0.369 | 0.052 | 0.130            | 0.011 | 0.021          | 0.022 | -14.6            | -1.7              |
| E2 Mean     | 1.426 | 0.076           | 0.002 | 1.229 | 0.079 | 0.150 | 0.028 | 0.027            | 0.001 | 0.003          | 0.003 | -30.1            | -4.6              |
| E3 Mean     | 1.436 | 0.075           | 0.002 | 1.228 | 0.081 | 0.150 | 0.027 | 0.022            | 0.001 | 0.002          | 0.002 | -23.4            | -3.2              |
| E4 Mean     | 1.448 | 0.073           | 0.002 | 1.223 | 0.075 | 0.146 | 0.026 | 0.018            | 0.001 | 0.002          | 0.002 | -20.7            | -2.8              |

**Table S5:** Species-electrical conductivity response curve types. Type I: no response/flat; Type II: monotonic increasing; Type III: monotonic decreasing plateau; Type IV: plateau; Type V: plateau Type VI: symmetrical unimodal (Gaussian); Type VII: skewed unimodal (Gaussian). Corresponding species name and code can be found in Supplementary Materials: Diatom Catalogue.

| Species code | Type | Species code | Type | Species code | Type |
|--------------|------|--------------|------|--------------|------|
| ACHmin       | IV   | BRAexi       | IV   | PSAobl       | III  |
| ACHmod       | IV   | NEIsp1       | IV   | PSAsta       | I    |
| ADLspp       | III  | NITgra       | I    | PSAsub       | IV   |
| AMPacu       | I    | NITsp1       | I    | PSAthe       | III  |
| AMPcop       | I    | NITsp5       | I    | STAacu       | III  |
| AMPven       | I    | NITunk       | I    | STAalp       | I    |
| AULdis       | VII  | STAspp       | I    | STAcri       | I    |
| CALsp1       | I    | PINspp       | IV   | STAexi       | IV   |
| CANpsu       | VII  | PINcar       | I    | STAlep       | I    |
| CAVhet       | I    | PINdec       | I    | STAmar       | I    |
| COCneo       | I    | PINdiv       | I    | STApin       | IV   |
| COCpla       | IV   | PINlec       | I    | STAsubg      | I    |
| CRAsub       | I    | PINobs       | I    | SURang       | I    |
| CYM          | IV   | PINrab       | IV   | SURR         | IV   |
| DIAbal       | IV   | PINrhom      | I    | UNK111       | V    |
| DIAspp.      | I    | PINsub-elo   | IV   | UNK119       | III  |
| DI Acomp     | I    | PLAaue       | IV   | UNK127       | I    |
| DIAlan       | I    | PLAcyc       | I    | UNK131-C     | II   |
| DIPsub       | I    | PLAdel       | IV   | UNK132       | I    |
| PSAinv.      | II   | PLAquad      | IV   | UNK18        | I    |
| EUNpal       | IV   | PLAren       | IV   | UNK21        | IV   |
| EUNsp2       | III  | PLAlan       | IV   | UNK21.b      | I    |
| FRAcap       | VII  | PSAabu       | VII  | UNK33        | I    |
| FRAsp2       | I    | PSAant       | I    | UNK44b       | I    |
| FRUsub       | IV   | PSAato       | VII  | UNK45        | I    |
| GOM11        | I    | PSAcon       | VII  | UNK54        | I    |
| GOMunk1      | I    | PSAger       | III  | UNK73        | I    |
| GOMunk2      | I    | PSAhod       | II   | UNK94        | I    |
| HANam        | I    | PSAinc       | I    | UNK94.b      | I    |
| NAVgre       | I    | PSAlev       | I    |              |      |
| NAVsem       | I    | UNK37        | IV   |              |      |
| NAVsp1       | II   | PSAman       | I    |              |      |

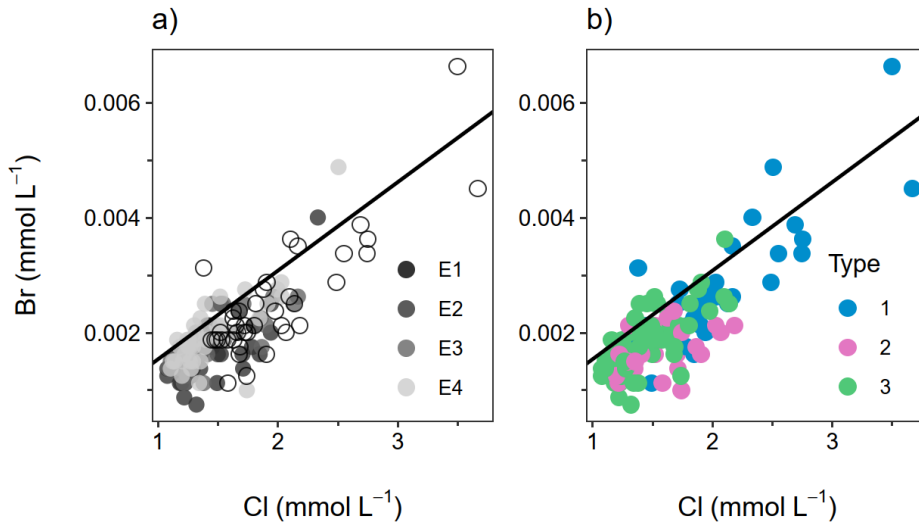

**Figure S1:** Cl/Br ratio of lake waters on Macquarie Island, black line shows the Cl/Br seawater ratio, classified by a) sampling event, b) lake type.

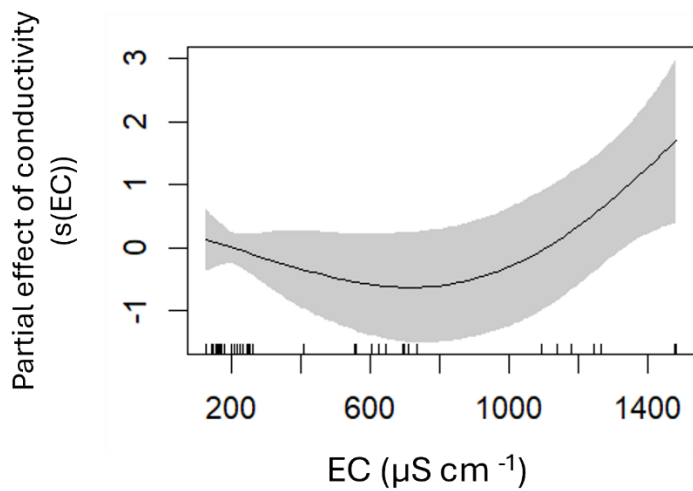

**Figure S2:** Generalised additive model (GAM) response curve for *Fragilaria capucina* along the electrical conductivity (EC) gradient. The fitted smooth term indicates a weakly non-linear response (edf = 2.19,  $p = 0.054$ ), explaining ~15–16% of deviance, consistent with a broad ecological tolerance rather than a strongly defined unimodal response.

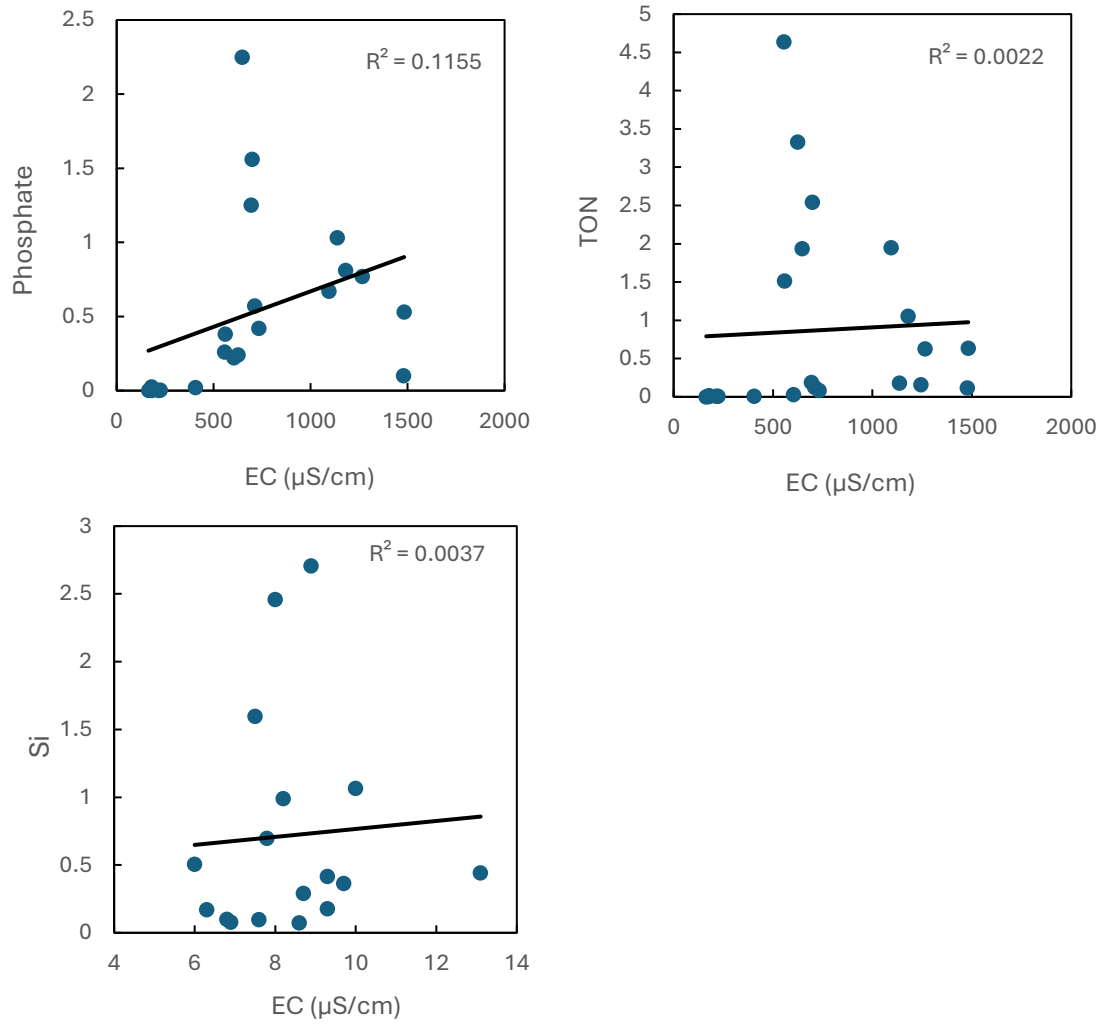

**Figure S3:** Linear correlations between electrical conductivity (EC) and nutrient variables from coastal lake sites.
